# Supplementary material for: The role of dew as a night-time reservoir and morning source for atmospheric ammonia
Source: Copernicus journal article supplement (doi:10.5194/acp-16-7435-2016), 2016-06-15
Supplement: Supplementary file 1 [file acp-16-7435-2016-supplement.pdf]

Supplement of Atmos. Chem. Phys., 16, 7435–7449, 2016  
<http://www.atmos-chem-phys.net/16/7435/2016/>  
doi:10.5194/acp-16-7435-2016-supplement  
© Author(s) 2016. CC Attribution 3.0 License.

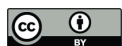

Atmospheric  
Chemistry  
and Physics  
Open Access  
EGU

*Supplement of*

## **The role of dew as a night-time reservoir and morning source for atmospheric ammonia**

**Gregory R. Wentworth et al.**

*Correspondence to:* Jennifer G. Murphy (jmurphy@chem.utoronto.ca)

The copyright of individual parts of the supplement might differ from the CC-BY 3.0 licence.

## 1 Supplemental

2 Table S1. Concentrations (in  $\mu\text{M}$ ) of ions in the nine synthetic dews

| <i>Dew</i> | $\text{Na}^+$ | $\text{NH}_4^+$ | $\text{K}^+$ | $\text{Ca}^{2+}$ | $\text{Cl}^-$ | $\text{NO}_3^-$ | $\text{SO}_4^{2-}$ | $\text{Ac}^-$ | <i>Form</i> | $^*\text{HCO}_3^-$ | <i>pH</i> |
|------------|---------------|-----------------|--------------|------------------|---------------|-----------------|--------------------|---------------|-------------|--------------------|-----------|
| A          | 214           | 232             | 44           | 78               | 166           | 44              | 90                 | 18            | 23          | 100                | 6.87      |
| B          | 177           | 319             | 0            | 96               | 214           | 260             | 98                 | 51            | 46          | 6                  | 5.64      |
| C          | 408           | 283             | 51           | 100              | 200           | 52              | 100                | 22            | 20          | 123                | 6.96      |
| D          | 252           | 283             | 51           | 100              | 347           | 52              | 100                | 22            | 20          | 37                 | 6.44      |
| E          | 234           | 353             | 0            | 104              | 202           | 268             | 100                | 46            | 48          | 36                 | 6.42      |
| F          | 296           | 394             | 0            | 113              | 219           | 267             | 100                | 48            | 48          | 76                 | 6.75      |
| G          | 417           | 381             | 0            | 119              | 214           | 262             | 97                 | 47            | 46          | 162                | 7.08      |
| H          | 607           | 361             | 0            | 101              | 184           | 223             | 85                 | 41            | 39          | 224                | 7.22      |
| I          | 740           | 369             | 0            | 112              | 218           | 265             | 99                 | 49            | 43          | 302                | 7.35      |

3 \*Calculated using carbonate equilibria, pH and assuming  $\text{P}_{\text{CO}_2} = 500$  ppm

1 Table S2. Concentration (in  $\mu\text{M}$ ) of ionic species in rain samples

| <i>Date</i> | $\text{Na}^+$ | $\text{NH}_4^+$ | $\text{K}^+$ | $\text{Mg}^{2+}$ | $\text{Ca}^{2+}$ | $\text{Ac}^-$ | $\text{Form}^-$ | $\text{Cl}^-$ | $\text{NO}_2^-$ | $\text{NO}_3^-$ | $\text{SO}_4^{2-}$ | $\text{HPO}_4^{2-}$ | $\text{Ox}^{2-}$ |
|-------------|---------------|-----------------|--------------|------------------|------------------|---------------|-----------------|---------------|-----------------|-----------------|--------------------|---------------------|------------------|
| 06/15       | 5.8           | 67.2            | 3.2          | 1.8              | 9.4              | 0             | 5.9             | 6.5           | 0.2             | 23.6            | 4.5                | 0.9                 | 0.9              |
| 06/16       | 2.8           | 29.6            | 1.0          | 1.4              | 9.5              | 0             | 5.5             | 3.3           | 0               | 19.0            | 5.1                | 0                   | 0                |
| 06/28       | 8.5           | 72.2            | 4.1          | 6.1              | 23.9             | 0             | 30.3            | 7.3           | 0               | 45.0            | 14.3               | 1.7                 | 3.1              |
| 07/01       | 8.7           | 55.6            | 2.8          | 8.6              | 41.0             | 0             | 9.0             | 14.0          | 0               | 49.9            | 11.8               | 1.6                 | 0                |
| <i>Avg</i>  | 6.5           | 56.2            | 2.8          | 4.5              | 21.0             | 0             | 12.7            | 7.8           | 0.1             | 34.4            | 8.9                | 1.1                 | 1.0              |

2

- 1 Table S3. Total Organic Carbon (TOC), Total Nitrogen (TN), Inorganic Carbon (IC), pH, and
- 2  $\text{Frac}(\text{NH}_3)$  for rain samples

| <i>Date</i> | <i>TOC</i><br><i>(mg C L<sup>-1</sup>)</i> | <i>IC</i><br><i>(mg C L<sup>-1</sup>)</i> | <i>TN</i><br><i>(mg N L<sup>-1</sup>)</i> | <i>pH</i>   | <i>Frac(NH<sub>3</sub>)</i> |
|-------------|--------------------------------------------|-------------------------------------------|-------------------------------------------|-------------|-----------------------------|
| 06/15       | 4.63                                       | 0.30                                      | 1.53                                      | 5.61        | 0.61                        |
| 06/16       | 2.86                                       | 0.18                                      | 0.71                                      | 4.64        | 0.59                        |
| 06/28       | 14.45                                      | 0.37                                      | 1.53                                      | 4.17        | 0.45                        |
| 07/01       | 7.06                                       | 0.31                                      | 1.42                                      | 4.63        | 1.0                         |
| <i>Avg</i>  | <i>7.25</i>                                | <i>0.29</i>                               | <i>1.30</i>                               | <i>4.54</i> | <i>0.66</i>                 |

3
